# Supplementary material
Source: PubMed Central journal article supplement (PMC6483844)
Supplement: NIHMS1522435-supplement-Supplemental_Digital_Content_2.pdf [file NIHMS1522435-supplement-Supplemental_Digital_Content_2.pdf]

**Appendix 1. Crude and Adjusted Prevalences of Opioid Pharmacotherapy Utilization Among Medicaid-Enrolled Pregnant Women With OUD, 2009-2015\***

| Year | Crude prevalence, % (95% CI) |                  |                  | Adjusted prevalence, % (95% CI) |                  |                  |
|------|------------------------------|------------------|------------------|---------------------------------|------------------|------------------|
|      | None observed                | Methadone        | Buprenorphine    | None observed                   | Methadone        | Buprenorphine    |
| 2009 | 53.2 (50.6-55.9)             | 31.6 (29.2-34.1) | 15.1 (13.2-17.0) | 52.6 (50.1-55.1)                | 31.6 (29.3-33.9) | 15.8 (13.9-17.8) |
| 2010 | 43.6 (41.1-46.1)             | 34.7 (32.3-37.1) | 21.7 (19.6-23.8) | 43.1 (40.7-45.5)                | 35.2 (32.9-37.5) | 21.7 (19.7-23.8) |
| 2011 | 42.0 (39.7-44.4)             | 32.8 (30.5-35)   | 25.2 (23.1-27.3) | 42.0 (39.8-44.3)                | 33.0 (30.9-35.1) | 25.0 (23.0-27.0) |
| 2012 | 42.5 (40.2-44.7)             | 29.0 (26.9-31.1) | 28.5 (26.5-30.6) | 42.8 (40.7-45)                  | 28.7 (26.8-30.6) | 28.5 (26.5-30.5) |
| 2013 | 43.6 (41.5-45.7)             | 27.1 (25.2-29.0) | 29.2 (27.3-31.2) | 43.8 (41.8-45.8)                | 27.4 (25.6-29.2) | 28.9 (27.0-30.7) |
| 2014 | 42.5 (40.4-44.5)             | 24.2 (22.5-26.0) | 33.3 (31.4-35.3) | 42.8 (40.8-44.8)                | 24.0 (22.3-25.6) | 33.2 (31.3-35.1) |
| 2015 | 43.9 (41.6-46.2)             | 25.1 (23.1-27.1) | 31.0 (28.9-33.1) | 43.9 (41.8-46.1)                | 25.2 (23.3-27.1) | 30.9 (28.8-33.0) |

\*Adjusted prevalences derived from multivariable negative binomial regression model controlling for: year of delivery, age, race, ethnicity, Medicaid region, medical co-morbidities including psychiatric disorder, HCV and HIV infection and substance use history including tobacco, alcohol and polysubstance use.

Krans EE, Kim JY, James AE, Kelley D, Jarlenski MP. Medication-assisted treatment utilization among pregnant women with opioid use disorder. *Obstet Gynecol* 2019; 133.

The authors provided this information as a supplement to their article.

©2019 American College of Obstetricians and Gynecologists.

**Appendix 2. Crude and Adjusted Counts of Behavioral Health Counseling Utilization by Opioid Pharmacotherapy Type Among Medicaid-Enrolled Pregnant Women With OUD, 2009-2015\***

| Year | Crude visit counts, N (95% CI) |                |               | Adjusted visit counts, N (95% CI) <sup>a</sup> |               |               |
|------|--------------------------------|----------------|---------------|------------------------------------------------|---------------|---------------|
|      | None observed                  | Methadone      | Buprenorphine | None observed                                  | Methadone     | Buprenorphine |
| 2009 | 3.3 (2.9-3.8)                  | 6.2 (5.2-7.2)  | 3.9 (3.3-4.6) | 3.6 (2.9-4.3)                                  | 5.7 (4.3-7.1) | 3.1 (2.0-4.2) |
| 2010 | 2.9 (2.5-3.3)                  | 5.4 (4.5-6.2)  | 3.4 (2.9-3.9) | 3.0 (2.4-3.7)                                  | 4.1 (3.2-5.0) | 5.4 (3.8-6.9) |
| 2011 | 3.0 (2.6-3.4)                  | 5.6 (4.8-6.4)  | 3.5 (3.0-4.1) | 3.1 (2.5-3.7)                                  | 4.4 (3.4-5.3) | 4.8 (3.6-6.0) |
| 2012 | 3.2 (2.7-3.6)                  | 5.9 (5.0-6.8)  | 3.7 (3.2-4.3) | 3.5 (2.8-4.1)                                  | 5.0 (3.9-6.2) | 4.5 (3.5-5.6) |
| 2013 | 2.7 (2.4-3.1)                  | 5.1 (4.4- 5.7) | 3.2 (2.8-3.6) | 3.0 (2.5-3.5)                                  | 5.1 (4.0-6.2) | 3.3 (2.6-4.0) |
| 2014 | 3.1 (2.7-3.5)                  | 5.9 (5.1-6.6)  | 3.7 (3.2-4.2) | 3.1 (2.6-3.6)                                  | 5.6 (4.4-6.8) | 3.5 (2.8-4.2) |
| 2015 | 3.6 (3.1-4.1)                  | 6.8 (5.8-7.7)  | 4.3 (3.7-4.9) | 4.0 (3.3-4.7)                                  | 6.4 (4.9-7.9) | 3.4 (2.6-4.1) |

\*Adjusted counts derived from multivariable negative binomial regression model controlling for: year of delivery, age, race, ethnicity, Medicaid region, medical co-morbidities including psychiatric disorder, HCV and HIV infection and substance use history including tobacco, alcohol and polysubstance use.

Krans EE, Kim JY, James AE, Kelley D, Jarlenski MP. Medication-assisted treatment utilization among pregnant women with opioid use disorder. *Obstet Gynecol* 2019; 133.

The authors provided this information as a supplement to their article.

©2019 American College of Obstetricians and Gynecologists.
